# Supplementary material
Source: Elsevier journal article supplement (https://www.sciencedirect.com/science/article/pii/S2174204920300416)
Supplement: mmc1 [file S2174204920300416:mmc1.docx]

.

| **Supplementary Table 1** Deformation results from tissue tracking in the subgroup of patients who underwent cardiac magnetic resonance imaging ≤15 days after the acute event. | | | | |
| --- | --- | --- | --- | --- |
|  | | | | All patients (n=19) |
| Systolic TT parameters | Strain (%) | Radial | Basal  Mid  Apical  Global | 32.2±13.4  27.4±12.4  35.9±14.0  30.8±11.6 |
| Circumferential | Basal  Mid  Apical  Global | -17.3±4.0  -15.9±4.7  -19.2±5.3  -17.1±4.5 |
| Longitudinal | 4-chamber  2-chamber  3-chamber  Global | -16.7±4.0  -16.9±3.9  -16.2±3.3  -16.5±3.4 |
| Strain rate (s-1) | Radial | Basal  Mid  Apical  Global | 2.2±0.9  1.7±0.8  2.3±0.9  1.9±0.7 |
| Circumferential | Basal  Mid  Apical  Global | -1.1±0.4  -1.0±0.3  -1.4±0.5  -1.1±0.3 |
| Longitudinal | 4-chamber  2-chamber  3-chamber  Global | -1.0±0.2  -1.0±0.2  -1.0±0.2  -0.9±0.2 |
| Velocity (mm/s) | Radial | Basal  Mid  Apical  Global | 44.4±12.3  34.6±8.9  35.8±9.5  36.7±8.1 |
| Longitudinal | 4-chamber  2-chamber  3-chamber  Global | 44.0±15.6  41.1±23.0  50.4±14.8  38.0±11.4 |
| Displacement (mm) | Radial | Basal  Mid  Apical  Global | 6.7±1.3  5.5±1.4  5.4±1.6  5.8±1.3 |
| Longitudinal | 4-chamber  2-chamber  3-chamber  Global | 5.0±2.3  6.6±2.5  6.1±1.7  5.8±1.8 |
| Diastolic TT parameters | Strain rate (s-1) | Radial | Basal  Mid  Apical  Global | -3.0±1.2  -1.9±1.2  -3.0±1.2  -2.2±1.0 |
| Circumferential | Basal  Mid  Apical  Global | 1.3±0.5  1.1±0.5  1.7±0.7  1.1±0.5 |
| Longitudinal | 4-chamber  2-chamber  3-chamber  Global | 1.2±0.3  1.1±0.3  1.0±0.3  1.1±0.2 |
| Data are presented as mean ± SD.  TT: tissue tracking. | | | | |

| 1. **Supplementary Table 2** Correlations between global myocardial deformation parameters and extent of left ventricular regional wall motion abnormalities, left ventricular late gadolinium enhancement and left ventricular ejection fraction, in patients who underwent cardiac magnetic resonance imaging ≤15 days after the acute event (n=19). In this subgroup, significant correlations are still found between both LV WMA and LVEF and most myocardial deformation parameters, while LV LGE was not significantly correlated with any myocardial deformation parameter. | | | | | |
| --- | --- | --- | --- | --- | --- |
|  | | 1. % LV WMA | | 1. % LV LGE | 1. LVEF |
| 1. Systolic TT parameters | 1. Strain (%) | 1. Radial | 1. r=-0.76 2. p<0.001 | 1. r=-0.06 2. p=0.798 | 1. r=0.81 2. p<0.001 |
| 1. Circumferential | 1. r=0.78 2. p<0.001 | 1. r=0.07 2. p=0.781 | 1. r=-0.79 2. p<0.001 |
| 1. Longitudinal | 1. r=0.68 2. p=0.001 |  | 1. r=-0.64 2. p=0.003 |
| 1. Strain rate (s-1) | 1. Radial | 1. r=-0.72 2. p<0.001 | 1. r=0.07 2. p=0.790 | 1. r=0.69 2. p=0.001 |
| 1. Circumferential | 1. r=0.50 2. p=0.030 |  | 1. r=-0.51 2. p=0.026 |
| 1. Longitudinal | 1. r=0.57 2. p=0.011 |  | 1. r=-0.39 2. p=0.100 |
| 1. Velocity (mm/s) | 1. Radial | 1. r=-0.45 2. p=0.052 |  | 1. r=0.38 2. p=0.105 |
| 1. Longitudinal | 1. r=-0.30 2. p=0.215 |  | 1. r=-0.30 2. p=0.215 |
| 1. Displacement (mm) | 1. Radial | 1. r=-0.81 2. p<0.001 | 1. r=-0.06 2. p=0.819 | 1. r=0.81 2. p<0.001 |
| 1. Longitudinal | 1. r=-0.28 2. p=0.248 |  | 1. r=0.27 2. p=0.273 |
| 1. Diastolic TT parameters | 1. Strain rate (s-1) | 1. Radial | 1. r=0.58 2. p=0.010 |  | 1. r=-0.71 2. p=0.001 |
| 1. Circumferential | 1. r=-0.40 2. p=0.094 |  | 1. r=0.56 2. p=0.013 |
| 1. Longitudinal | 1. r=-0.39 2. p=0.103 |  | 1. r=0.48 2. p=0.039 |
| 1. Correlation analysis was performed using Spearman’s rank correlation coefficient (r). 2. LGE: late gadolinium enhancement; LV: left ventricular; LVEF: left ventricular ejection fraction; TT: tissue tracking; WMA: wall motion abnormalities. | | | | | |
